# Supplementary material for: Deconvolution of the Gene Expression Profiles of Valuable Banked Blood Specimens for Studying the Prognostic Values of Altered Peripheral Immune Cell Proportions in Cancer Patients
Source: PubMed Central journal article supplement (PMC4069164; doi:10.1371/journal.pone.0100934), 2014-06-24
Supplement: pone.0100934.s001.pdf [file pone.0100934.s001.pdf]

**Table S1. Clinical Characteristics of the NSCLC patients in the tissue dataset**

| <b>Variable</b>             | <b>Patients [N]</b> | <b>[%]</b> |
|-----------------------------|---------------------|------------|
| <b>All</b>                  | 139                 | 100        |
| <b>Histological subtype</b> |                     |            |
| AD                          | 82                  | 59         |
| SCC                         | 34                  | 25         |
| LCC                         | 18                  | 13         |
| NSCLC                       | 5                   | 3          |
| <b>Gender</b>               |                     |            |
| Male                        | 97                  | 70         |
| Female                      | 42                  | 30         |
| <b>Stage</b>                |                     |            |
| I                           | 72                  | 52         |
| II & III                    | 67                  | 48         |
| <b>Age (years)</b>          |                     |            |
| <63                         | 66                  | 47         |
| ≥63                         | 73                  | 53         |
| <b>Chemotherapy</b>         |                     |            |
| No                          | 139                 | 100        |

**Note:** "AD", "SCC", and "LCC" represent adenocarcinoma, squamous cell carcinoma, and large cell carcinoma, respectively.
